# Supplementary material for: Early Prediction of Tumor Response to Neoadjuvant Chemotherapy and Clinical Outcome in Breast Cancer Using a Novel FDG-PET Parameter for Cancer Stem Cell Metabolism
Source: PubMed Central journal article supplement (PMC7565130; doi:10.3390/jpm10030132), 2020-09-17
Supplement: jpm-10-00132-s001.pdf [file jpm-10-00132-s001.pdf]

## Supplementary Materials

**Table S1.** MTVcsc measurement in target lesions.

| Highest MTVcsc        | HER2-positive/TN (N=82) |                       | Luminal (N=38) |                       |
|-----------------------|-------------------------|-----------------------|----------------|-----------------------|
|                       | pCR (N=22)              | Residual tumor (N=60) | pCR (N=0)      | Residual tumor (N=38) |
| Breast tumor          | 18                      | 57                    | 0              | 33                    |
| Lymph node metastasis | 4                       | 3                     | 0              | 5                     |

**Table S2.** Prediction of tumor response to NAC using MTVcsc according to the molecular subtypes.

|                               | TN (N=25)   |                       | HER2-positive/<br>non-luminal (N=30) |                       | Luminal B (N=27) |                       |
|-------------------------------|-------------|-----------------------|--------------------------------------|-----------------------|------------------|-----------------------|
|                               | pCR (N=6)   | Residual tumor (N=19) | pCR (N=12)                           | Residual tumor (N=19) | pCR (N=4)        | Residual tumor (N=23) |
| MTVcsc < 1.75 cm <sup>3</sup> | 6           | 3                     | 12                                   | 5                     | 4                | 13                    |
| MTVcsc > 1.75 cm <sup>3</sup> | 0           | 16                    | 0                                    | 13                    | 0                | 10                    |
| Prediction accuracy           | 88% (22/25) |                       | 83% (25/30)                          |                       | 52% (14/27)      |                       |
